# Supplementary material for: Results from a large cross-sectional study assessing Chlamydia trachomatis, Ureaplasma spp. and Mycoplasma hominis urogenital infections in patients with primary infertility
Source: PubMed Central journal article supplement (PMC8249471; doi:10.1038/s41598-021-93318-1), 2021-07-01
Supplement: 41598_2021_93318_MOESM1_ESM.pdf [file 41598_2021_93318_MOESM1_ESM.pdf]

**Results from a large cross-sectional assessing *Chlamydia trachomatis*,  
*Ureaplasma spp.* and *Mycoplasma hominis* urogenital infections in  
patients with primary infertility.**

Daniela A. Paira <sup>1</sup>, Guillermo Molina <sup>2</sup>, Andrea Tissera <sup>3</sup>, Carolina Olivera <sup>1</sup>,  
Rosa I. Molina <sup>3</sup>, Ruben D. Motrich <sup>1\*</sup>.

<sup>1</sup> Centro de Investigaciones en Bioquímica Clínica e Inmunología (CIBICI-  
CONICET), Facultad de Ciencias Químicas, Universidad Nacional de Córdoba,  
5016, Córdoba, Argentina.

<sup>2</sup> Servicio de Urología y Andrología. Hospital Privado Universitario de Córdoba,  
5016, Córdoba, Argentina.

<sup>3</sup> Laboratorio de Andrología y Reproducción (LAR), 5000, Córdoba, Argentina.

\* Corresponding author: Ruben D. Motrich. CIBICI-CONICET. Facultad de  
Ciencias Químicas. Universidad Nacional de Córdoba. Haya de la Torre y  
Medina Allende. Ciudad Universitaria. Córdoba. X5016HUA. Argentina.

Phone: +54-351-535-3882 ext. 3152. E-mail: [rmotrich@unc.edu.ar](mailto:rmotrich@unc.edu.ar)

<https://orcid.org/0000-0002-5772-1285>

**Supplementary Table S1.** Multivariate analysis of risk factors for *C. trachomatis*, *Ureaplasma* spp. or *M. hominis* urogenital infection in patients with couple's primary infertility

| Variables              | <i>C. trachomatis</i> infection |          |          |                 |           |                | <i>Ureaplasma</i> spp. infection |          |                 |             |                    | <i>M. hominis</i> infection |          |                 |             |                    |
|------------------------|---------------------------------|----------|----------|-----------------|-----------|----------------|----------------------------------|----------|-----------------|-------------|--------------------|-----------------------------|----------|-----------------|-------------|--------------------|
|                        | n                               | Positive | Negative | Odds ratio      | 95% CI    | <i>p</i>       | Positive                         | Negative | Odds ratio      | 95% CI      | <i>p</i>           | Positive                    | Negative | Odds ratio      | 95% CI      | <i>p</i>           |
| <b>Age (yo)</b>        |                                 |          |          |                 |           |                |                                  |          |                 |             |                    |                             |          |                 |             |                    |
| > 40                   | 1404                            | 89       | 1315     | 1.00 (referent) |           |                | 276                              | 1128     | 1.00 (referent) |             |                    | 97                          | 1307     | 1.00 (referent) |             |                    |
| 40 - 25                | 3587                            | 167      | 3420     | 0.75            | 0.57-0.98 | <b>0.036 *</b> | 838                              | 2749     | 1.20            | 1.01-1.43   | <b>0.046 *</b>     | 269                         | 3318     | 0.84            | 0.64-1.11   | 0.228              |
| < 25                   | 173                             | 19       | 154      | 1.91            | 1.13-3.24 | <b>0.016 *</b> | 62                               | 111      | 2.38            | 1.64-3.45   | <b>&lt;0.001 *</b> | 14                          | 159      | 0.51            | 0.27-0.96   | <b>0.039 *</b>     |
| <b>Sex</b>             |                                 |          |          |                 |           |                |                                  |          |                 |             |                    |                             |          |                 |             |                    |
| Women                  | 1554                            | 67       | 1487     | 1.00 (referent) |           |                | 484                              | 1070     | 1.00 (referent) |             |                    | 188                         | 1366     | 1.00 (referent) |             |                    |
| Men                    | 3610                            | 208      | 3402     | 1.38            | 1.03-1.84 | <b>0.030 *</b> | 692                              | 2918     | 0.64            | 0.54-0.74   | <b>&lt;0.001 *</b> | 192                         | 3418     | 0.57            | 0.44-0.71   | <b>&lt;0.001 *</b> |
| <b>Infection</b>       |                                 |          |          |                 |           |                |                                  |          |                 |             |                    |                             |          |                 |             |                    |
| <i>C. trachomatis</i>  |                                 |          |          |                 |           |                |                                  |          |                 |             |                    |                             |          |                 |             |                    |
| Negative               | 4889                            | -        | -        |                 |           |                | 1106                             | 3783     | 1.00 (referent) |             |                    | 354                         | 4535     | 1.00 (referent) |             |                    |
| Positive               | 275                             | -        | -        |                 |           |                | 70                               | 205      | 1.10            | 0.80-1.53   | 0.548              | 26                          | 249      | 1.27            | 0.78-2.06   | 0.340              |
| <i>Ureaplasma</i> spp. |                                 |          |          |                 |           |                |                                  |          |                 |             |                    |                             |          |                 |             |                    |
| Negative               | 3988                            | 205      | 3783     | 1.00 (referent) |           |                | -                                | -        |                 |             |                    | 31                          | 3957     | 1.00 (referent) |             |                    |
| Positive               | 1176                            | 70       | 1106     | 1.10            | 0.79-1.53 | 0.560          | -                                | -        |                 |             |                    | 349                         | 827      | 51.53           | 35.70-75.08 | <b>&lt;0.001 *</b> |
| <i>M. hominis</i>      |                                 |          |          |                 |           |                |                                  |          |                 |             |                    |                             |          |                 |             |                    |
| Negative               | 4784                            | 249      | 4535     | 1.00 (referent) |           |                | 827                              | 3957     | 1.00 (referent) |             |                    | -                           | -        |                 |             |                    |
| Positive               | 380                             | 26       | 354      | 1.33            | 0.82-2.16 | 0.247          | 349                              | 31       | 51.57           | 35.39-75.13 | <b>&lt;0.001 *</b> | -                           | -        |                 |             |                    |

95%CI: 95% confident interval. A \**p*<0.05 was considered statistically significant.

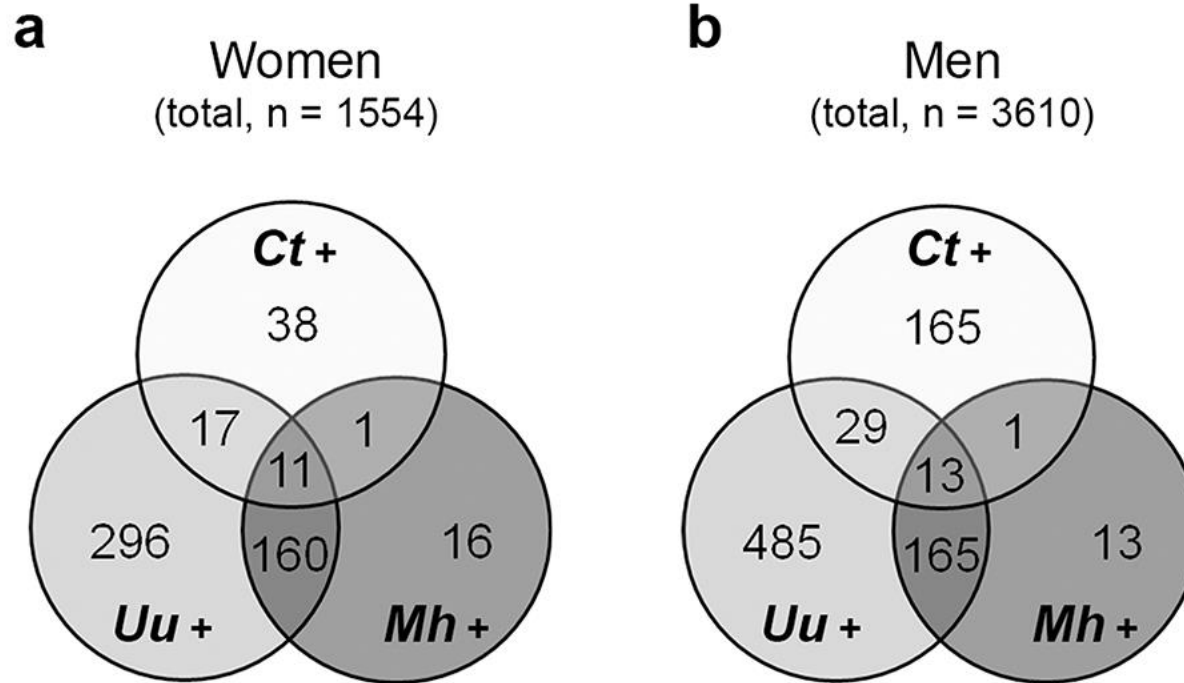

**Supplementary Figure S1:** Representative scheme of *C. trachomatis*, *Ureaplasma* spp. and *M. hominis* infections and co-infections in patients with couple's primary infertility. Venn diagrams represent three main groups that correspond to the uropathogens analyzed: *C. trachomatis* (Ct), *Ureaplasma* spp. (Uu) and *M. hominis* (Mh). The unions of the sets symbolize the presence of the respective co-infections. Data are shown as number of female (a) and male (b) patients.
